1 **Title page**

2 **Title: Soil causes gut microbiota to flourish and total serum IgE levels to decrease**

3 **in mice**

4 **Authors:** Dongrui Zhou<sup>1\*</sup>, Na Li<sup>1</sup>, Fan Yang<sup>1</sup>, Honglin Zhang<sup>2</sup>, Zhimao Bai<sup>3</sup>, Yangyang Dong<sup>1</sup>,  
5 Mengjie Li<sup>1</sup>, Wenyong Zhu<sup>4</sup>, Zhongjie Fei<sup>4</sup>, Pengfeng Xiao<sup>4</sup>, Xiao Sun<sup>4</sup> and Zuhong Lu<sup>4</sup>

6 **Affiliations:**

7 <sup>1</sup>Key Laboratory of Child Development and Learning Science of Ministry of Education, Southeast  
8 University, Nanjing 210096, China.

9 <sup>2</sup>College of Food Science, Nanjing Xiaozhuang University, Nanjing 211171, China.

10 <sup>3</sup>Key Laboratory of Environmental Medicine Engineering of Ministry of Education, Southeast  
11 University, Nanjing 210009, China.

12 <sup>4</sup>State Key Laboratory of Bioelectronics, Southeast University, Nanjing 210096, China.

13 **\*For Correspondence:**

14 Key Laboratory of Child Development and Learning Science of Ministry of Education, Southeast  
15 University, Nanjing 210096, China.

16 Phone: +86 25-83793310-802

17 Fax: +86 25-83793310-802

18 Email: junbai1013@seu.edu.cn

19

20 **Running title: Mice gut microbiota thrives with soil**

21

## 22 **Abstract**

23 **Background:** Traditional farm environments provide protection from allergic diseases. In this study,  
24 farm environmental factors were classified into three categories: environmental microbes, soil, and  
25 organic matter. To explore the impact of soil and environmental microorganisms on gut microbiota  
26 and immune function, mice were fed sterilized soil, soil microbes (in lieu of environmental  
27 microbes), or non-sterilized soil.

28 **Results:** Metagenomic sequencing results showed that the intake of sterile soil while inhaling a  
29 small amount of soil microbes in the air, increased gut microbial diversity and the abundance of  
30 type III secretion system (T3SS) genes and decreased total serum IgE levels induced by 2-4-  
31 dinitrofluorobenzene. The intake of soil microbes increased the abundance of genes involved in the  
32 metabolism of short-chain fatty acids and amino acid biosynthesis. By contrast, the intake of soil  
33 increased gut microbial diversity, the abundance of T3SS genes and related infectious elements, and  
34 genes associated with the metabolism of short-chain fatty acids and amino acid biosynthesis and  
35 decreased serum IgE levels. The immune function was positively and significantly correlated with  
36 the bacterial secretion system genes, especially with that of T3SS.

37 **Conclusions:** An important mechanism through which farm environments exert a protective effect  
38 against allergic diseases could be by serving as a “prebiotic” promoting the reproduction and growth  
39 of some intestinal microorganisms that harbor bacterial secretion system genes, especially those of  
40 T3SS, whose abundance was positively and significantly correlated with innate immune function of  
41 mice.

42

43 **Key words:** Gut microbiota, Hygiene hypothesis, Soil, Total serum IgE, Type III secretion  
44 systems

45

46

47

48

49

50

## 51 **Introduction**

52 Several epidemiological studies have shown that children growing up on traditional farms  
53 suffer less from asthma, hay fever, and allergic sensitization [1-4]. A healthy gut microbiota is  
54 necessary for proper human immune function [5-8]. Many studies suggest that farm environments  
55 could increase the diversity and richness of gut microbiota and shape its composition or structure  
56 [5, 8-11], especially that of children who live on farms at an early age [12, 13].

57 There is a high-level of exposure to airborne microbes, animals, dust, plants, and soil on farms  
58 [14]. In addition, a wide variety of different microorganisms are present throughout farms [14, 15].  
59 It has been speculated that the environmental microbiota present in ambient air may interact with  
60 and supplement an individual's intestinal microbiota [14, 16]. Farm animals are also considered an  
61 important factor that may contribute to improving human immunity [17, 18] and the microbiota in  
62 dust of households with pets is substantially richer and more diverse than found in homes without  
63 pets [19]. Furthermore, cohabiting individuals tend to share gut microbial communities [20], but  
64 interestingly, people tend to share more microbial communities with their dogs [20]. It has been  
65 reported that the field area of green space is inversely proportional to the incidence rate of allergic  
66 diseases [21, 22]. This may be explained by plants shaping the content and abundance of rhizosphere  
67 microorganisms and provide habitats for the microorganisms on the ground [23]. Finally, there is a  
68 lot of dust on farms with the principal components being microbes, soil, pollen, animal dander, and  
69 hair [14].

70 As an important component of the farm environment, soil is the microecological environment  
71 with the largest number of microbial species on earth [24] and is known as the "seed bank" of  
72 microorganisms[25]. In comparison, the number of different species of human intestinal  
73 microorganisms is approximately 1/10<sup>th</sup> found in soil [24]. Interestingly, approximately 80% of the  
74 microorganisms in the soil are in a dormant state, similar to plant seeds [24]. Once they are exposed  
75 to a suitable living environment, they multiply [25]. In primitive farming stages and less developed  
76 areas, people have greater contact with soil [26], children often use their mouths to explore their  
77 surrounding environment [26, 27], and in some countries, individuals actually use soil as a food  
78 source [28]. Finally, soil mixed in the bedding material or present in the living environment of  
79 animals has an important effect on their gut microbiota [26, 29].

80 To investigate the specific factors on farms that influence gut microbiota, we grouped farm  
 81 environmental factors into three categories, environmental microbes, soil, and organic substances  
 82 from plants or animals (Table 1). To explore the impact on the gut microbiota of each factor,  
 83 excluding organic matter, adult mice (Table S1) were randomly divided into four groups, a group  
 84 fed soil (Soil), a group fed sterilized soil (SS), a group administered with microbes in their water  
 85 (MW), and a normal control group. The animals were analyzed using 16S rDNA and metagenomic  
 86 sequencing to evaluate the composition and richness of the gut microbiota.

87 **Table 1.** Summary of farm environmental factors affecting gut microbiota.

| Content        | Affecter   | Ingredients       | Category                           |
|----------------|------------|-------------------|------------------------------------|
| Air            | Aerosol    | Microbes          | Environmental microbe <sup>#</sup> |
|                | Pollen     | Microbes          | Environmental microbe <sup>#</sup> |
|                |            | Organic substance | Organic substance <sup>&amp;</sup> |
| Animals        | Scurf      | Microbes          | Environmental microbe <sup>#</sup> |
|                |            | Organic substance | Organic substance <sup>&amp;</sup> |
|                | Hair       | Microbes          | Environmental microbe <sup>#</sup> |
|                |            | Organic substance | Organic substance <sup>&amp;</sup> |
|                | Feces      | Microbes          | Environmental microbe <sup>#</sup> |
|                |            | Organic substance | Organic substance <sup>&amp;</sup> |
| Green<br>-land | Vegetation | Microbes          | Environmental microbe <sup>#</sup> |
|                |            | Organic substance | Organic substance <sup>&amp;</sup> |
|                | Soil       | Microbes          | Environmental microbe <sup>#</sup> |
|                |            | Sterilized soil   | Sterilized soil                    |
| Dust           | Soil       |                   |                                    |
|                | Scurf      |                   |                                    |
|                | Hair       |                   |                                    |
|                | Pollen     |                   |                                    |

88 <sup>#</sup>Surface soil microbes were used instead of environmental microbes and the parasites was not investigated in this  
 89 study. The MW mice were treated by adding soil microbes to the drinking water. <sup>&</sup>The effect of organic substance  
 90 on gut microflora was not investigated in this study, which could refer to the effect of diet.

91

92 The specific treatment of each group is shown in Fig. 1 and Fig. S1. To test the effect of the  
 93 treatments on immune function, 2-4-dinitrofluorobenzene (DNFB) was used topically to induce

94 eczema on the skin of the mice, and the serum IgE levels were then measured.

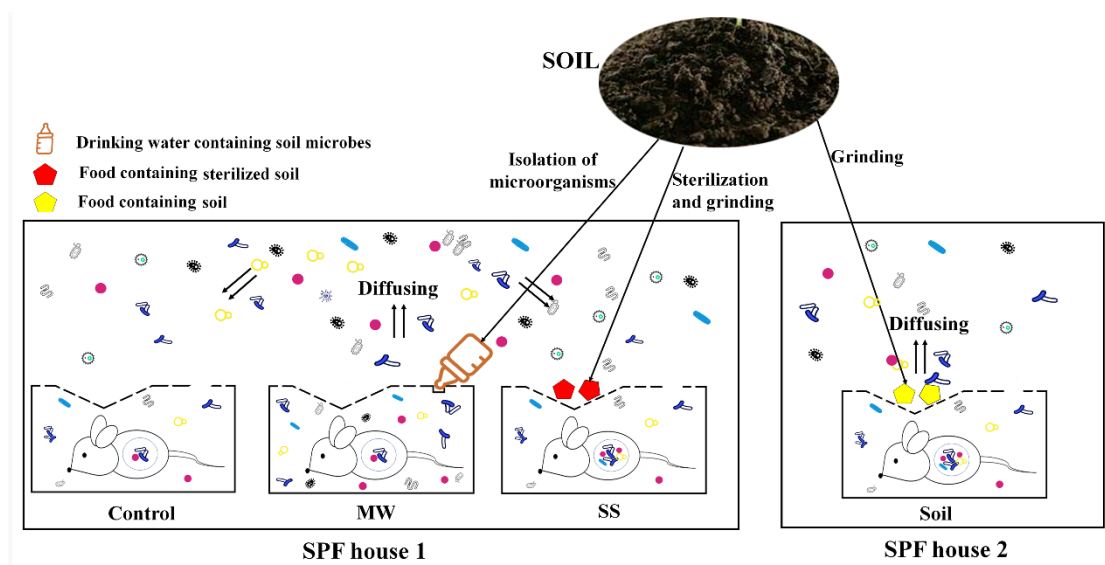

96

97 **Fig. 1. Schematic diagram of mouse groups and experimental treatments.** Control:  
98 experiment control mice; MW: mice provided drinking water containing soil microbes (Table S2); SS:  
99 mice fed diets containing sterilized soil (Table S3); Soil: mice fed diets containing unsterilized soil. The  
100 Control, MW, and SS groups of mice were housed in the same SPF room. All mouse cages were covered  
101 with wire mesh, which allowed microbes to diffused from the MW mouse cages. The Control and SS  
102 mice inhaled microbes from the cages of the MW mice. The Soil group of mice were housed in different  
103 SPF animal room. Diet, age, nest, lighting, cleanliness, bedding, house temperature, and humidity were  
104 consistent for all four groups of mice.

105

## 105 **Results**

### 106 **Soil-intake or sterilized-soil-intake increased gut microbial diversity and richness**

107 The four groups of mice were treated for 42 days as shown in Fig. 1. Fresh fecal samples from  
108 mice were collected (Fig. S1) and the gut microbiota analyzed using high-throughput sequencing.

109 We sequenced the 16S rDNA of the fecal samples with polymerase chain reaction (PCR)  
110 amplification of the V4 hypervariable region primed using the 515F-907R primer set. For every  
111 quarter increase in microbial diversity or richness, the risk of allergic disease is reduced by 55%  
112 [30]. A total of 1,921,486 sequences were qualified with the average sequence of each sample being  
113 50,565. We used rarefaction to normalize the number of reads in each sample of the operational  
114 taxonomic unit (OTU) table to 38,680 sequences and analyzed the diversity of the intestinal  
115 microbiota in each group. The rarefaction curve revealed that the microbiota diversity of the Soil

116 group and SS group were similar, which were higher than those of the MW group and Control group,  
117 which were similar (Fig. 2A).

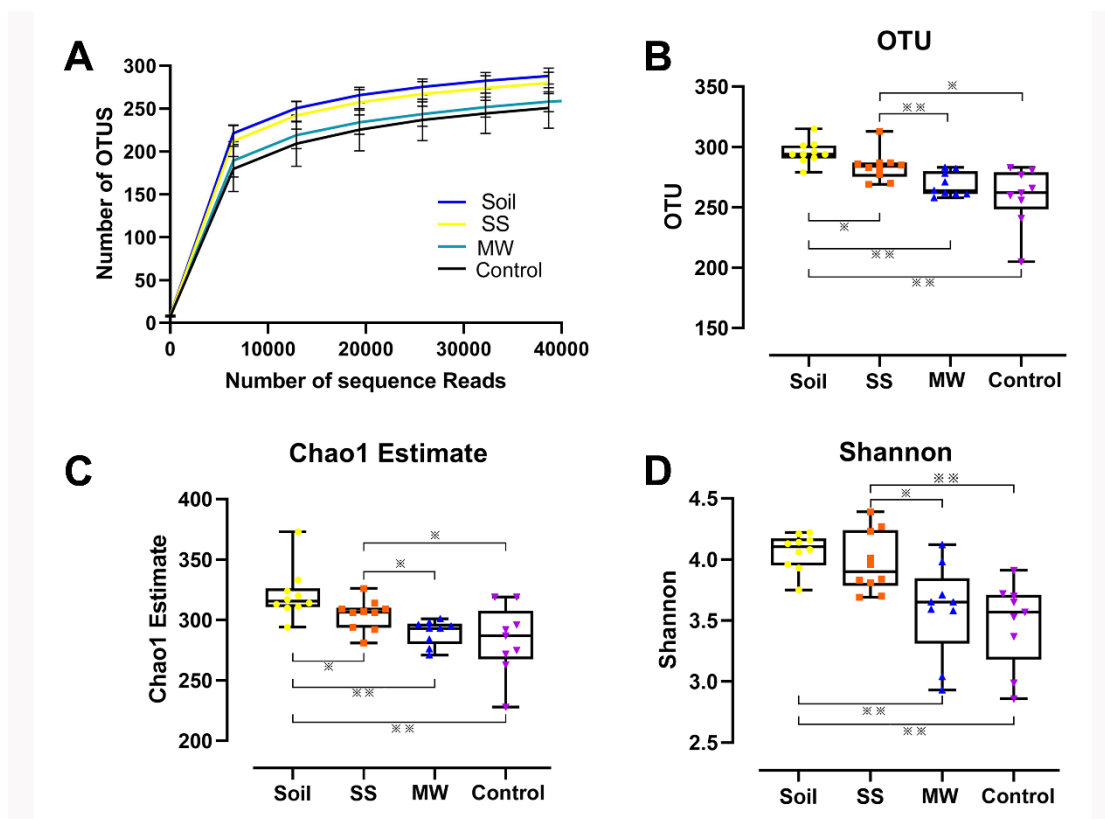

118

119 **Fig. 2. Richness and diversity of the four experimental groups of mice were compared** (n = 9  
120 or 10; \* $P < 0.05$ , \*\* $P < 0.01$ , two-tailed least significant difference test). A. Rarefaction curves of unique  
121 operational taxonomic units (OTUs) at a 97% threshold. B. Box graph of OTUs. C. Chao1 estimators. D.  
122 Shannon index.

123 As shown in Fig. 2B and Table S4, the number of OTUs in the SS group was significantly  
124 more than that in the MW or Control groups ( $P < 0.05$ ), but less than that in the Soil group ( $P <$   
125  $0.05$ ). There was no significant difference between the MW and Control groups. Similar results  
126 were obtained when abundance was estimated using the Chao1 index (Table S4 and Fig. 2C).  
127 However, the Shannon index showed no significant difference between the SS and Soil groups  
128 (Table S4 and Fig. 2D).

129 From this viewpoint, the intake of sterilized soil significantly improved the diversity and  
130 richness of intestinal microorganisms in mice to levels similar to that of the Soil group. However,  
131 neither the diversity nor richness of the gut microbiota significantly changed when only microbes  
132 isolated from soil were ingested.

133

134 **Changes in gut microbial composition**

135 Principal coordinates analysis (PCoA) of the unweighted UniFrac distance matrix showed  
 136 obvious differences between each group of mice. Specifically, the intestinal microbial structure of  
 137 the mice in the SS and Soil groups were similar, whereas those in the MW and Control groups were  
 138 similar (Fig. 3A). It could also be seen that the distance between the SS and Soil groups was shortest,  
 139 followed by that between the Control and MW group (Fig. 3B, Table S5). The longest distance was  
 140 between the MW and Soil groups. Furthermore, PCoA of the Bray-Curtis matrix of metagenomics  
 141 sequences were like that of the 16S rRNA gene sequences (Fig. 3C and 3D, and Table S5).

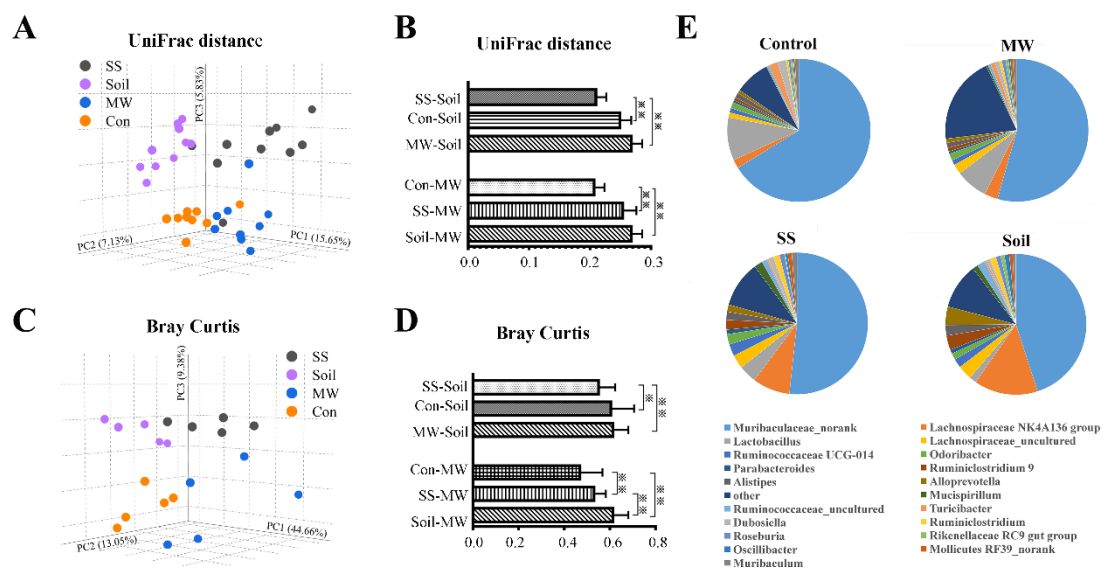

142  
 143 **Fig. 3. Changes of gut microbial community.** A. principal coordinates analysis (PCoA) of  
 144 unweighted UniFrac distance of 16S rRNA gene sequencing. B. Each bar represents the mean  $\pm$  SEM (n  
 145 = 9 or 10). C. PCoA of unweighted Bray-Curtis matrix of metagenomics shotgun sequences. D. Each bar  
 146 represents the mean  $\pm$  SEM (n = 5). E. Pie chart of top 20 most abundant genera. \* $P < 0.05$ , \*\* $P < 0.01$ ,  
 147 according to two-tailed least significant difference test.

148  
 149 The most abundant genera based on 16S rDNA sequences were identified using the RDP  
 150 Classifier. There were obvious differences in the composition of the top 20 most abundant genera  
 151 among the four groups (Fig. 3E and Table S6). The pie chart of the Control group was more similar  
 152 to that of the MW group, whereas that of the SS group was more similar to that of the Soil group.  
 153 The same conclusions were reached using the column of genera abundance/type in each phylum of

154 the top five most abundant phyla (Fig. S2) and the results of species abundance/type among the  
155 different groups (Fig. S3).

156 Random forest is a supervised machine learning technique that uses multiple decision trees to  
157 train and predict samples. It is a powerful classifier that can use non-linear relationships and  
158 complex dependence between OTUs/strains to identify the OTUs/strains that are important to the  
159 structural makeup of the microbiota. An importance score is assigned to each OTU/strain based on  
160 the increased error caused by deleting that OTU/strain from the prediction set. In the current study,  
161 we considered an importance score for an OTU of at least 0.0005 as being highly predictive. There  
162 were 67 predictive OTUs at the species-level between the SS and SPF groups, of which 55 (82%)  
163 were overrepresented in the SS group (Table S7). However, there were 36 predictive OTUs between  
164 the MW and SPF groups with only 25 OTUs (69%) being overrepresented in the MW group (Table  
165 S7). Correspondingly, analysis of the Soil and SPF groups showed there were 74 predictive OTUs  
166 with the Soil group presenting 63 (85%) more OTUs (Table S7). Interestingly, compared with MW  
167 group, there were 64 and 49 predictive OTUs in Soil and SS groups, respectively, among which 54  
168 (84%) were overrepresented in Soil group and 41 overrepresented in the SS group (Table S7).

169 The results of random forest analysis of strains based on shotgun sequencing of the microbial  
170 metagenome were similar to those of the above 16S rDNA sequencing analysis (Fig. S4 and Table  
171 S8). The strains listed in Table S8 meet two standards; first, the random forest importance score of  
172 the strain was at least 0.001, and second, the p-value of t-test was less than 0.05. Compared with  
173 Control mice, there were 128 predictive species for the Soil mice, 108 for the SS mice, and 52 for  
174 the MW mice, overrepresenting 96, 85, and 47 microbes, respectively (Fig. S4A and Table S8).

175 Based on these results, we concluded that ingestion of soil-isolated microbes, sterilized soil, or  
176 farm soil each had an influence on the intestinal microbial structure and composition of mice. The  
177 effect of eating sterilized soil was more similar to that of the Soil group, whereas the effect of  
178 drinking soil microbes was more similar to that of the Control group.

179

### 180 **Intake of sterilized soil increased the abundance of type III secretion system (T3SS) genes**

181 To further understand the mechanism by which ingesting soil or drinking soil microbes  
182 influenced the mouse intestinal microbiota, analyses of microbe species and genes were conducted



183 using the metagenomic shotgun sequence data. To search for their biological relevance, we selected  
184 microbe species with significant differences between experimental groups based on t-test analysis  
185 and with importance scores exceeding 0.001 (Table S8). It was determined that the biological  
186 functions for 62.7–89.8% of the microbes selected had not been previously published (Fig. S4B,  
187 Table S8). Among the species selected, four had functions reported. One is an engineering bacterium,  
188 the second is an antibiotic producing microbe, the third is pathogenic to plants or animals other than  
189 mice, and the fourth one is a mouse pathogen (Fig. S4B, Table S8). Compared to that of the Control  
190 mice, the SS and Soil mice intestinal microbiota were more abundant for mouse pathogens (Fig. 4A,  
191 Fig. S4B, and Table S8), whereas the MW mice had no greater number of mouse pathogens but had  
192 more of four other types of microbes (Fig. S4B and Table S8).

193         When the abundance of functional genes was compared between groups, it was found that  
194 the SS group showed a significant increase in the abundance of genes encoding T3SS and two-  
195 component systems compared with that in the Control or MW mice (Fig. 4B, Fig. S5 and Table S9).  
196 Compared to the MW mice, the Soil mice harbored more genes encoding T3SS (Fig. S5), two-  
197 component systems, and butanoate metabolism (Fig. 4B and Table S9). Accordingly, the ingestion  
198 of soil or sterilized soil increased the abundance of mouse and other pathogens, as well as genes  
199 coding for T3SS and two-component systems.

200

201

## 202 **Intake of soil microbes increased the abundance of genes for short-chain fatty acid metabolism** 203 **and amino acid biosynthesis**

204         Compared with that of the Control mice, the MW mice exhibited increased abundance of  
205 enzyme genes used in the metabolism of short-chain fatty acid (Fig. 5A and Table S9), including  
206 butyric acid, propionic acid, and acetic acid, as well as genes involved in amino acid biosynthesis.  
207 Compared with that of the SS mice, the Soil mice exhibited similar differences (Fig. 5B and Table  
208 S9).

209

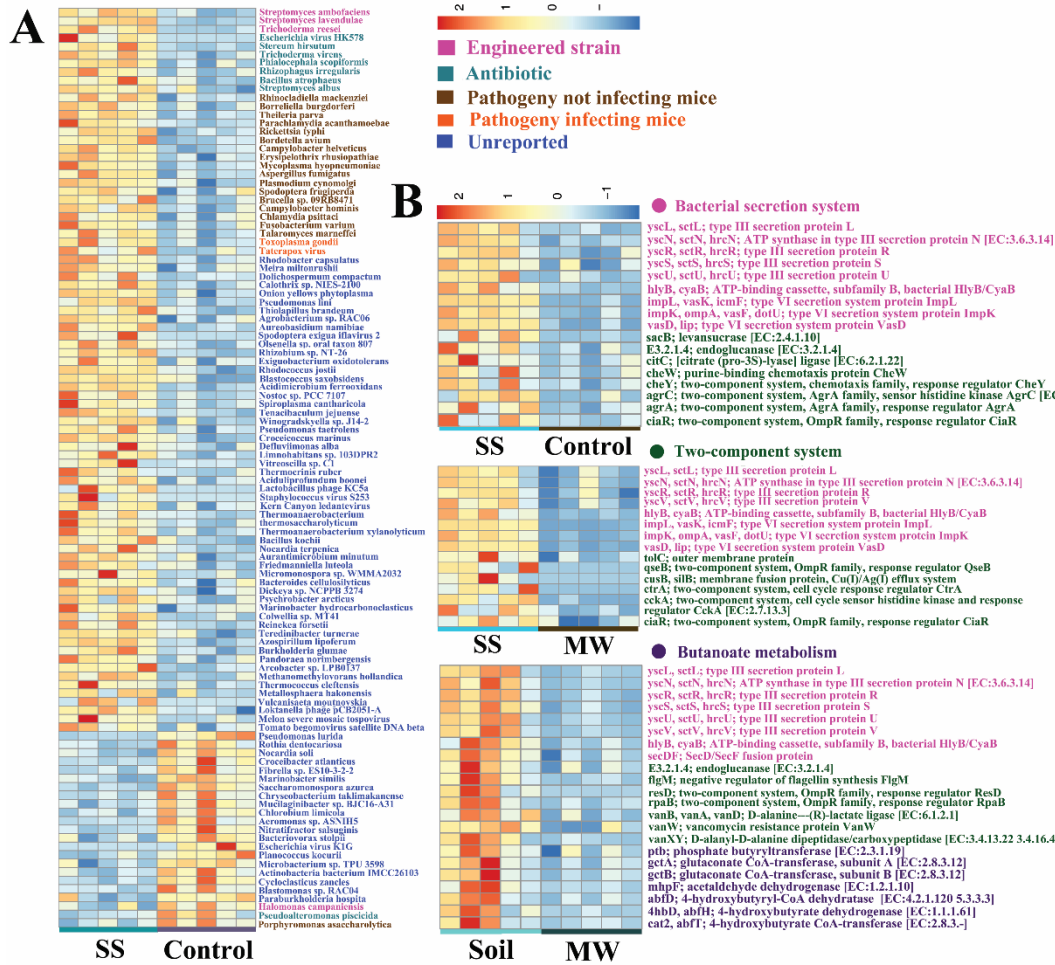

210

211

212

213

214

215

216

217

218

**Fig. 4. Heatmaps for impact of sterilized soil-intake on species and gene abundance of gut microbial metagenomics.** A. Microbial species between SS and Control mice. Each color characteristic represents the same functional microbial species (n = 5/group). B. Abundance of functional genes between the SS and Control mice, the SS and MW mice, and the Soil and MW mice. Each color character represents the same functional gene (n=5,5). Treatment groups include mice receiving soil added to their diet (Soil) or sterile soil added to their diet (SS) or provided soil microbes in their drinking water (MW). Untreated mice served as a control (Control) group.

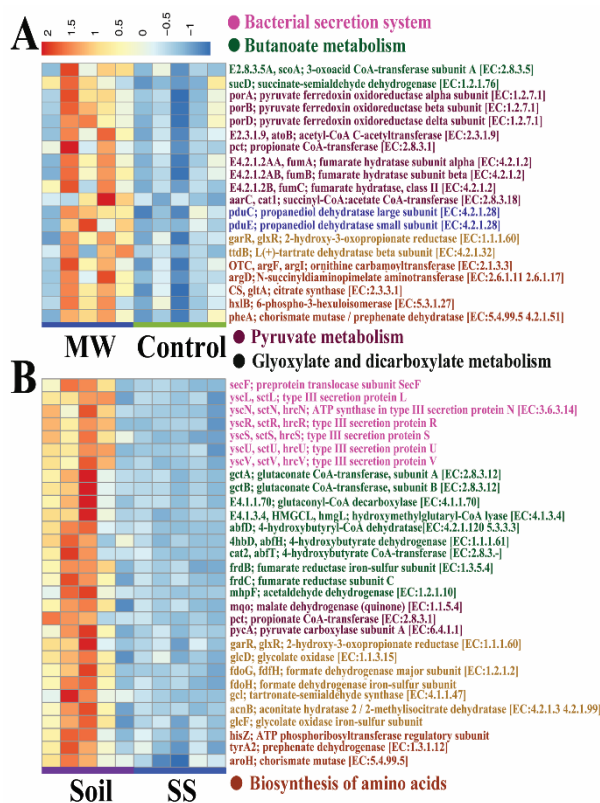

**Fig. 5. Heatmaps for effects of soil microbe-intake on gene abundance of gut microbial metagenomics.** A. Comparison between the MW and Control groups of mice (n = 5/group). B. Comparison between the Soil and SS groups of mice (n = 5/group). Treatment groups include mice receiving soil added to their diet (Soil) or sterile soil added to their diet (SS) or provided soil microbes in their drinking water (MW). Untreated mice served as a control (Control) group.

220

221 The Soil mice ingested the same soil as the SS mice, but the soil-based microbes remained for  
 222 the Soil group. Compared with that of the Control group, the Soil group of mice demonstrated  
 223 increased abundance of not only genes for T3SS and two-component systems but also that for short-  
 224 chain fatty acid metabolism and amino acid synthesis (Fig. S6). Furthermore, the abundance of  
 225 genes for flagellar assembly (Fig. S7) and bacterial chemotaxis (Fig. S8), as well as additional genes  
 226 for short-chain fatty acid metabolism (Fig. S9) and amino acid biosynthesis, was also increased in  
 227 the Soil mice (Fig. S6).

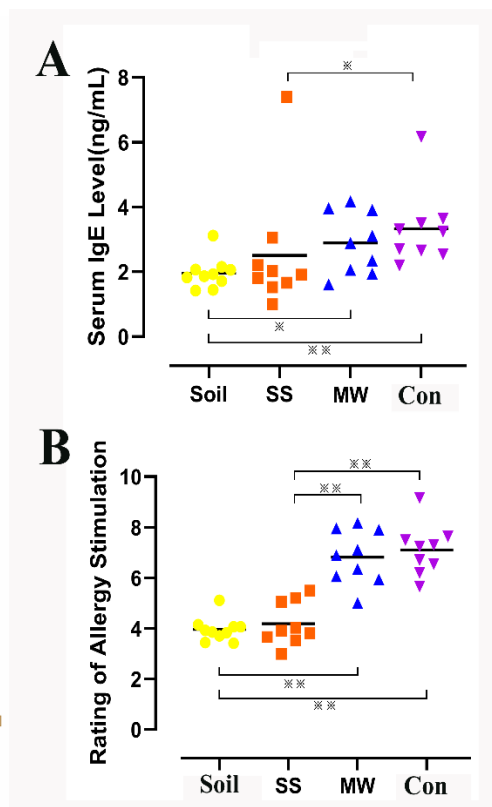

**Fig. 6. Effects of intake of soil, sterilized soil, or soil microbes on immunity.** (A) Total serum IgE levels and (B) skin damage in mice treated with 2-4-dinitrofluorobenzene (DNFB). (n = 9 or 10/group; \* $P < 0.05$ , \*\* $P < 0.01$ , according to two-tailed least significant difference test)

228 The intake of soil microbes played an important role in increasing the abundance of genes  
229 involved in short-chain fatty acid metabolism and amino acid biosynthesis. Besides the common  
230 functions induced by the intake of either soil microbes or sterile soil, the intake of soil containing  
231 the microbes prompted the germination a greater number of different functional genes in addition  
232 to their increased relative abundance.

233

#### 234 **Soil-intake or sterilized soil-intake decreased serum IgE levels**

235 To analyze the impact of ingesting soil, sterilized soil, and soil microbe-containing water on the  
236 immune function of mice, we stimulated eczema on the skin of the four experimental groups of mice  
237 using DNFB and then measured serum IgE levels. The results revealed the serum IgE levels of the  
238 Soil and SS mice were significantly lower than those of the Control mice ( $P < 0.05$ ). Furthermore,  
239 the levels of the Soil mice were significantly lower than the MW mice ( $P < 0.05$ ; Fig. 6A). Although  
240 the median IgE value of the SS group was lower than the MW group, the difference was not  
241 statistically significant (Fig. 6A). Skin damage was also scored for the mice. The skin lesion scores  
242 in the Soil and SS groups were significantly lower than those in the Control and MW groups ( $P <$   
243  $0.05$ ), but there was no significant difference between the Soil and SS mice or between the MW and  
244 Control mice (Fig. 6B).

245 The Soil group and SS group demonstrated significant increases in the numbers of mouse  
246 pathogens and genes of T3SS. To determine whether these pathogens led to infection, hematological  
247 analysis of blood samples was performed. The results showed no indication of infection (Table S10).

248 To further explore which strain or gene was related to the enhancement of immune function in  
249 then mice, we performed a correlation analysis between IgE levels and the strains or functional  
250 genes detected by high-throughput sequencing (Fig. S10, Fig. S11, Table S11, and Table S12). The  
251 results showed that the microbes with significant correlation included fritillary virus Y and the soil  
252 bacteria *Burkholderia glumae*, among others (Fig. S10 and Table S11). The significance of these  
253 microbes in mice has not been reported, nor have there been any reports on their influence on  
254 immunity. The significant correlation for functional genes included six genes of T3SS and six genes  
255 of metabolic pathways (Fig. S11 and Table S12). The T3SS genes came from the same cell organ  
256 and work together to perform their function in promoting infection by the bacteria. Therefore, these

257 T3SS-coding genes may be more closely related to the levels of IgE than the genes for the metabolic  
258 pathways.

259 There were 76 genes of bacterial secretion systems registered in the Kyoto Encyclopedia of  
260 Genes and Genomes (KEGG) database of which 43 (56.6%) were sequenced in this study. As shown  
261 in Table S13, 15 (34.9%) of the genes in the Soil group and 18 (41.9%) of the genes in the SS group  
262 were significantly more abundant than those in the Control group ( $P < 0.05$ ). Only three genes of  
263 the MW group were observed at abundance higher than the Control group. Compared with that of  
264 the MW group, 11 (25.6%) genes of the Soil group and 9 (20.9%) genes of the SS group were more  
265 abundant.

266 Overall, the results showed that the intake of soil or sterilized soil improved the immune function  
267 of mice and did not cause obvious infections. The immune function was positively and correlated  
268 with the bacterial secretion system genes, especially with that of T3SS.

269

## 270 **Discussion**

271 To explore the specific factors of the farm environment that influenced the protection against  
272 allergic diseases, we fed mice farm soil, sterilized soil, and soil microbes. The results showed that  
273 ingestion of sterilized soil significantly increased the diversity of intestinal microbes and abundance  
274 of T3SS genes, and decreased serum IgE levels, induced by DNFB. Ingestion of soil microbes  
275 increased the abundance of genes for the metabolism of short-chain fatty acids and the biosynthesis  
276 of amino acids. The intake of soil, which included the components of both the sterilized soil and the  
277 soil microbes, not only increased abundance in the intestinal microbiota of T3SS genes and the  
278 related infectious elements, but it also significantly increased the abundance of genes related to the  
279 metabolism of short-chain fatty acids and biosynthesis of amino acids. The intake of soil or sterilized  
280 soil significantly improved the immune function of mice and did not cause obvious infections. The  
281 immune function was positively and significantly correlated with the bacterial secretion system  
282 genes, especially with T3SS.

283 Based on our findings, soil played an important role in supporting the survival of some  
284 intestinal microorganisms in mice. In the absence of soil, ingestion of only soil microbes feeding  
285 resulted in changes of gut microbial diversity and structure, but the levels of change were

286 significantly lower than those observed in the mice that ingested soil or sterilized soil. Therefore,  
287 soil may function as a “prebiotic” for various microbial strains or may be necessary, establishing a  
288 physical environment required for their survival. There are different ways soil functions: (1) soil is  
289 a mineral used for the survival of many intestinal microorganisms. Soil is known to contain  
290 abundant microorganisms [25], at numbers 10 times greater than those in the human intestine [25].  
291 (2) As a multi-pore structure, soil might provide the physical environment for microbial survival.  
292 Some microorganisms hide in soil particles, which may help them avoid been killed by microbial  
293 products such as antibiotics in the intestinal tract, or bactericides secreted by the human body such  
294 as antimicrobial peptides or IgA.

295 Ingestion of sterilized soil increased the diversity of intestinal microflora in mice under  
296 conditions in which the mice were inoculated with microorganisms via the air. Our previous study  
297 found that in a SPF animal facility, adding sterilized soil to mouse bedding changed the composition  
298 of intestinal microflora of mice, but did not increase the diversity of the intestinal microorganisms  
299 [26]. In the current study, the experiment was designed so the SS group of mice were reared next to  
300 the MW mice, which consumed soil microbes via their water. The open mouse cages could not  
301 prevent soil microbes from spreading to the SS mice. The results demonstrated increased gut  
302 microbial diversity of the SS mice.

303 In the current study, there was no significant difference in the immune function of mice fed  
304 soil microbes compared with that of the Control mice. Further, the intake of soil microbes  
305 significantly increased the abundance of genes involved in short-chain fatty acid metabolism and  
306 amino acid biosynthesis. Short-chain fatty acids play a role in improving human immunity [31]. In  
307 addition, several reports have indicated that both resident and passing microbes can increase the  
308 immune function of mice [6, 14]. During ingesting soil microbes, many bacteria pass through the  
309 gut, which theoretically should stimulate the immune system of the mice and increase their immune  
310 function. There may be two reasons to explain our current results: (1) the Control group and MW  
311 group were raised in the same SPF animal facility. The mouse cage cover was a reticular structure  
312 and the soil microbes have spread from the cages of the MW mice to the Control mice, resulting in  
313 the immune function of the Control mice being enhanced; (2) we only evaluated the serum IgE

314 levels for the mice after immune stimulation with DNFB and additional immune changes may not  
315 have been detected.

316 Pathogenic microbes and T3SS genes were detected in both the SS group and Soil group of  
317 mice, and the flagellar assembly gene was abundant in the Soil mice (Table S9 and Fig. S6).  
318 However, no infection was detected in the blood of any animals tested, which may have been due  
319 to these reasons: (1) the infection occurred during the early stage of the experiment and had resolved  
320 by the time we tested the blood of the mice; (2) the infection was weak and failed to present a clinical  
321 phenotype. No infections or deaths were observed during the experiment. It is very possible that the  
322 mice maintained a good interaction with the soil during the evolutionary process, or there may  
323 simply have been no strongly virulent pathogenic bacteria in the selected soil.

324 The current results also showed a strong correlation between IgE levels and the abundance of  
325 T3SS genes. T3SS exists in a variety of animal and plant pathogens, including *Chlamydia* spp. T3SS  
326 helps pathogenic microbes establish contact with host cells and plays roles in remodeling host  
327 cytoskeleton[32], host immune responses[33], and intestinal mucosal immunity[34]. In addition,  
328 T3SS also exists in plant rhizobia and plays a key role in establishing symbiotic relationships with  
329 host cells[35]. The pathogenic mechanism of T3SS has been widely reported[35], but the  
330 mechanism involved in improving host immune function needs further study.

331 In this study, a mouse model was used as the research approach, but there are great differences  
332 in lifestyles and evolutionary relationships between humans and mice. Therefore, the impact of soil  
333 on human intestinal microflora may differ and needs more experimental proof.

334 In conclusion, Our results showed that an important reason farm environments have  
335 protective effects on allergic diseases is that soil can be used as a “prebiotic” to increase the diversity  
336 and richness of intestinal microbiota and promote the reproduction and growth of microorganisms  
337 harboring the genes of bacterial secretion system. Further mechanistic studies revealed that soil  
338 improved the natural immune function of mice mainly by increasing the abundance of genes of  
339 bacterial secretion system of gut microbiota, especially those of T3SS.

340

341

342

## 343 **Materials and methods**

### 344 **Experimental design**

345 At total of 60 mice aged 3–4 weeks were randomly divided into four groups (n = 20/group).  
346 The temperature of SPF animal facility was maintained at  $24 \pm 2$  °C, humidity was  $40 \pm 5\%$ , and  
347 the lights were on a 12 h/12 h light/dark cycle. Bedding material were change once a week. Starting  
348 at 7 weeks of age, the SS group was fed a diet containing 5% sterilized soil (Fig. S1), the Soil group  
349 was provided a diet containing 5% non-sterilized soil, and the MW group was provided drinking  
350 water containing  $\sim 10^{11}$  soil microbes. No treatment was performed for the Control group, which  
351 continued to receive a standard lab diet and normal drinking water.

352 After 42 d of treatment, feces from 10 mice in each group was randomly collected and stored  
353 at  $-80$  °C for further intestinal microbiota analysis. Some mice in each group were used to perform  
354 the hematology analysis of blood samples, and the other mice were treated with DNFB and  
355 evaluated for serum IgE levels.

356 Soil was collected from farm ground at a depth greater than 0.5 cm, but no more than 10 cm.  
357 The soil composition was analyzed using a Wavelength Dispersive X-Ray Fluorescence  
358 spectrometer (Thermo Fisher, Waltham, MA, USA) with the results in Table S3. The soil was  
359 sterilized using autoclave at  $121$  °C for 30 min, which was repeated three times at a 24 h interval.  
360 Before use, the sterilized soil and non-sterilized soil were crushed and mixed with the mouse diet.  
361 Sterilized or non-sterilized soil feed was stored at  $-20$  °C.

362 Soil microbes were isolated as following: Fresh farm soil was collected and mixed with sterile  
363 water at 2:1 (w/v). After stirring with a magnetic rod for 20 min, the solution was allowed to stand  
364 undisturbed for 10 min. The supernatant was then collected and centrifuged at  $41 \times g$  for 5 min. The  
365 supernatant was collected and allowed to stand for 48 h. The supernatant was again collected and  
366 centrifuged at  $7440 \times g$ . The supernatant was discarded, and the precipitate suspended in sterile  
367 water. A bacterial smear was prepared for microscopic examination. After confirming no soil  
368 particles remained in the microbe solution, it was added to the drinking water of the MW mice. The  
369 water was changed using a fresh microbial mixture once a week. The soil sample and microbes  
370 sample isolated from the soil underwent 16S rDNA high-throughput sequencing to analyze their  
371 microbial compositions (Table S2).



372 **Animal care and use**

373 Animal experiments were conducted in strict accordance with the guidelines of the Animal  
374 Research Ethics Committee of Southeast University. All animal experiments were approved by the  
375 Animal Care Research Advisory Committee of Southeast University and the National Institute of  
376 Biological Sciences (approval number: 2017063009). All efforts were made to minimize and  
377 alleviate the pain the animals may experience. Specifically, the health of the mice was monitored  
378 every other day, and the weight measured weekly. The health status of mice was evaluated by  
379 observing changes in body weight and stool shape or appearance. In cases of serious diseases  
380 including one or more symptoms, such as weight loss of 15–20%, diarrhea, loss of hair quality, pain  
381 as indicated by an arched back or curled posture, or lethargy for over 1 week, the animals would be  
382 euthanized to reduce pain and suffering. Euthanasia was carried out: 1% (w/v) pentobarbital sodium  
383 (50 mg/kg) was injected intraperitoneally. Once the mice had lost consciousness, they were killed  
384 by a cervical dislocation and confirmed to be dead. Two people administered the injection, one held  
385 the animal, and the other gave the injection. The animals were not left unattended during the  
386 operation.

387

388 **DNFB treatment and serum IgE detection**

389 DNFB was dissolved in acetone/olive oil (3:1) with the final concentrations of DNFB being  
390 0.15% and 0.20%. Approximately 10 cm<sup>2</sup> of hair was removed in the backs of the mice. After hair  
391 removal, 25 µl of 0.15% DNFB was applied to the ears of mice and 100 µl of the same solution was  
392 applied to the back on day 1 and day 4 of treatment. On days 7, 10, and 13, 0.2% DNFB was used  
393 to topically treat the mice at the same locations. Anesthesia of pentobarbital sodium was  
394 administered 24 h after the final DNFB treatment. Blood samples were collected from the eyes of  
395 the mice, allowed to clot, and the serum isolated through centrifugation. The serum was stored at  
396 –80 °C until analysis. Serum IgE levels were detected using an Invitrogen Mouse IgE ELISA Ready-  
397 SET-Go Kit (eBioscience) following the manufacturer's instructions.

398

399

400

## 401 **MiSeq sequencing and data handling**

402 DNA sequencing and analysis were performed at Shanghai Biozeron Biological Technology  
403 Co. A fecal DNA Kit (Omega Bio-tek, Norcross, Georgia, USA) was used to extract the microbial  
404 DNA. The 515F and 907R primer set was used to PCR amplify the V4 hypervariable region of  
405 bacterial 16S rDNA and the amplicons were sequenced using an Illumina HiSeq X instrument with  
406 pair-end 150 bp (PE150) mode. FLASH software version 1.2.7 was used to merge the raw paired-  
407 end reads. Trimmomatic version 0.30 was used to eliminate low quality sequences. USEARCH  
408 version 7.1 was used to delete chimeric sequences. QIIME software version 1.9.1 software package  
409 was used to cluster the sequences into *de novo* OTUs using a 97% similarity threshold. RDP  
410 Classifier software version 11.5 was used to taxonomically assign the OTUs.

411 The genomic DNA was sheared using a Covaris S220 Focused-ultrasonicator (Woburn, MA  
412 USA). The fragmented DNA was then used to prepare metagenomic shotgun sequencing libraries.  
413 Trimmomatic was used to trim quality of the raw sequence reads and the Burrows-Wheeler Aligner  
414 (BWA) mem algorithm used to map the sequences against the human genome. Clean taxonomic  
415 reads were then determined using Kraken2 according to the kraken database, which includes the  
416 National Center for Biotechnology Information (NCBI) RefSeq database in which all bacterial,  
417 archaeal, fungal, viral, protozoan, and algae genomic sequences are deposited (issue number: 90).  
418 The abundances of taxonomy were estimated using the Bayesian Reestimation of Abundance after  
419 Classification with Kraken (Bracken) statistical method.

420 Megahit was used to generate a set of contigs for each sample. Prodigal (v2.6.3) was used to  
421 predict the open reading frames (ORFs) of the contigs. All ORFs generated a set of unique genes  
422 after clustering with CD-HIT. The longest sequence of each cluster was the representative sequence  
423 for the genes. Salmon software was used to obtain the read number of each gene for calculating the  
424 gene abundance in the total sample. BLASTX was used to search the function of the genes coding  
425 proteins in the KEGG database. The specific functions and pathways were found in the KEGG path  
426 database.

427

428

429

## 430 **Data analysis and statistical tests**

431 The  $\alpha$  diversity indices were calculated for each sample based on the 16S rDNA sequence  
432 data using Chao1 estimator and the Shannon diversity/richness index. The 16S rDNA sequence data  
433 was also used to determine the Kraken metrics of unweighted UniFrac distances between groups  
434 and PCoA was performed to show dissimilarities using QIIME. The Bray-Curtis dissimilarity  
435 metrics between any two groups was calculated based on the metagenomic sequence data and PCoA  
436 was performed using R version 3.2.3. Random forests analysis was performed as described  
437 previously [36]. Briefly, R was used with 500 trees and all default settings to analyze the  
438 metagenomic sequence data of the 16S rDNA OTUs and species. Out-of-box (OOB) error was used  
439 to estimate the generalization error. To calculate OOB error and importance score for each  
440 comparison, 10 relevant subsets of samples were extracted from OTU/species tables. SPSS software  
441 18.0 (SPSS Company, Chicago, IL, USA) was used for t-test and analysis of variance (ANOVA).

442

## 443 **Abbreviations**

444 IgE: immune globulin E; T3SS: type III secretion system; DNFB: 2-4-  
445 dinitrofluorobenzene; ORF: Open reading frame; PCR: polymerase chain reaction; OUT:  
446 operational taxonomic unit; PCoA: Principal coordinates analysis; KEGG: Kyoto Encyclopedia of  
447 Genes and Genomes; IgA: immune globulin A; SPF: special pathogen free; BWA: Burrows-  
448 Wheeler Aligner; NCBI: National Center for Biotechnology Information; OOB: Out-of-box.

## 449 **Acknowledgments**

450 This work was supported by The Natural Science Foundation of China (grant no.  
451 31770540) and The Key Research Program of Jiangsu (grants no. BE2018663).

## 452 **Authors' contributions**

453 DZ designed the experiments. NL, FY, HZ, PX and ZF performed the experiments. ZB,  
454 FY, YD, ML, WZ, ZL and XS analyzed the data. DZ and FY wrote the main manuscript. All  
455 authors read and approved the final manuscript.

456 **Availability of data and materials**

457 Raw sequence reads for all samples described above were deposited into the NCBI Sequence Read

458 Archive (SRA) database (project number, PRJNA686840 )

459

460 **Competing interests**

461 No competing interests were disclosed.

462

463

464

465

466

467

468

469

470

471

472

473

474

475

476

477

478

479

480 **Supplementary information**

481 **Table S1.** SS, Soil, MW, and Control groups of mice and treatment.

482 **Table S2.** Comparison of 16S rDNA high-throughput sequence data between microbiota isolated  
483 from the soil and soil microbiota.

484 **Table S3.** Soil composition analysis.

485 **Table S4.** Multiple comparisons of diversity between each two groups of mice.

486 **Table S5.** P values of multiple comparisons of unweighted UniFrac distances and Bray-Curtis  
487 between bacterial fecal communities of mice fed different diets.

488 **Table S6.** Top 20 most abundant genera in all groups. Multiple comparisons between each two  
489 groups.

490 **Table S7.** Random forests classifier of 97% ID operational taxonomic units (OTUs) at species-level  
491 phylotypes used to discriminate fecal microbiota according to different treatments.

492 **Table S8.** Species identified by random forests analysis of shotgun sequencing data that exhibit  
493 significant differences in their representation in the fecal microbiomes between each two groups of  
494 mice.

495 **Table S9.** Abundant functional genes of the gut microbiota based on metagenomic shotgun  
496 sequencing data.

497 **Table S10.** Hematological analysis of mouse blood samples.

498 **Table S11.** Correlation analysis between serum IgE levels and species from shotgun sequencing of  
499 gut metagenomics.

500 **Table S12.** Correlation analysis between serum IgE levels and Kyoto Encyclopedia of Genes and  
501 Genomes (KEGG) entries based on shotgun sequencing of gut metagenomics.

502 **Table S13.** Comparison of the abundance of structure protein genes of the bacterial secretion system.

503

504 **Fig. S1. Timeline indicating the treatment of mice with diets containing soil or sterile soil, or**  
505 **soil microbes provided in their drinking water, and the collection of fecal samples.** For the three

506 test groups, the treatments included feeding the mice diets containing soil (Soil) or sterile soil (SS),  
507 or providing soil microbes in the drinking water (MW). The treatments were administered starting  
508 at the age of 7 weeks (W7). Untreated animals served as a control group (Con). Fecal samples were  
509 collected on the 42nd day (D42) of treatments and the treatment started on day 0 (D0) for all the  
510 four groups of mice.

511 **Fig. S2. Detailed relative abundance of bacterial genera classified via 16S rDNA sequences;**

512 the five most abundant major phyla of the gut microbiota observed:

513 *A. Firmicutes. B. Bacteroidetes. C. Deferribacteres. D. Actinbacteria. E. Tenericutes.* Each bar  
514 represents an individual mouse.

515 **Fig. S3. Species with obvious differences in relative abundance classified via 16S rDNA**

516 **sequences of the gut microbiota.** Strains abundant in the Soil and SS groups of mice (A, B) and  
517 the MW and Control groups of mice (C, D). Control: experiment control mice; MW: mice provided  
518 drinking water containing soil microbes; SS: mice fed diets containing sterilized soil; Soil: mice fed  
519 diets containing unsterilized soil.

520 **Fig. S4. Species identified via random forests analysis based on shotgun sequencing that**

521 **exhibit significant differences in their representation in the fecal microbiomes of between each**

522 **two groups of mice.** A. Column diagram of the number of overrepresented species. B. Pie charts  
523 of the ratio of overrepresented species and the percent of each functional microbe. The data are  
524 listed in Table S8.

525 **Fig. S5. Diagram of Kyoto Encyclopedia of Genes and Genomes (KEGG) entries for the type**

526 **III bacterial secretion system.** KEGG entries whose proportional representation was higher in the

527 fecal microbiomes of the SS and Soil mice compared with that of the Control or MW mice. P-values

528 for the highlighted Kos can be found in Table S9. Control: experiment control mice; MW: mice

529 provided drinking water containing soil microbes; SS: mice fed diets containing sterilized soil; Soil:

530 mice fed diets containing unsterilized soil.

531

532 **Fig. S6. Heatmap for abundant functional genes of intestinal microbiota of mice that ingested**

533 **soil with their diet (Soil).** The analysis was based on metagenomic shotgun sequencing data of the

534 Soil group of mice compared to that of the Control group mice. (n = 5/group). The data are listed in  
535 Table S9.

536 **Fig. S7. Diagram of Kyoto Encyclopedia of Genes and Genomes (KEGG) entries for flagellar**  
537 **assembly indicating KEGG entries whose proportional representation was higher in the**  
538 **fecal microbiomes of the Soil group mice compared with that in the Control mice.** P-values  
539 for the highlighted Kos can be found in Table S9. Control: experiment control mice; Soil: mice  
540 fed diets containing unsterilized soil.

541 **Fig. S8. Diagram of Kyoto Encyclopedia of Genes and Genomes (KEGG) entries for bacterial**  
542 **chemotaxis.** KEGG entries whose proportional representation was higher in the fecal microbiomes  
543 of the Soil group mice compared with that in the Control mice. P-values for the highlighted KEGG  
544 entries can be found in Table S9. Control: experiment control mice; Soil: mice fed diets containing  
545 unsterilized soil.

546 **Fig. S9. Diagram of Kyoto Encyclopedia of Genes and Genomes (KEGG) pathway for**  
547 **butanoate metabolism.** KEGG entries whose proportional representation was higher in the fecal  
548 microbiomes of the Soil mice compared with that in the Control mice. P-values for the highlighted  
549 KEGG entries can be found in Table S9. Control: experiment control mice; Soil: mice fed diets  
550 containing unsterilized soil.

551 **Fig. S10. Spearman correlations between serum IgE levels and the abundance of**  
552 **species.** The coefficients were calculated for the representation of each species obtained  
553 from shotgun sequencing of the gut microbial metagenome. A spearman correlations  
554 coefficient of  $\pm 1$  indicates maximum correlation with age; zero indicates minimum  
555 correlation. The X-axis is the ID number of the species and the Y-axis is the correlation  
556 coefficient. Five microbes with significant difference and their correlation coefficient being  
557 at least 0.88 are shown. Spearman correlations coefficients and P-values for all the species  
558 can be found in Table S11.

559 **Fig. S11. Spearman correlations between serum IgE levels and the abundance of**  
560 **function genes.** The coefficients were calculated for the representation of each function  
561 gene obtained from shotgun sequencing of the gut microbial metagenome. A spearman  
562 correlations coefficient of  $\pm 1$  indicates maximum correlation with age; zero indicates

563 minimum correlation. The X-axis is the ID number of the functional gene and the Y-axis  
564 is the correlation coefficient. The function genes with spearman correlation coefficients under  
565 0.80 have significant differences. Spearman correlation coefficients and P-values for all the  
566 species can be found in Table S11.

567

## 568 **References**

- 569 1. Mutius Ev, Vercelli D. Farm living: effects on childhood asthma and allergy. *Nature reviews*  
570 *Immunology*. 2010;10:861-8.
- 571 2. Riedler J, Braun-Fahrländer C, Eder W, Schreuer M, Waser M, Maisch S, et al. Exposure to  
572 farming in early life and development of asthma and allergy: a cross-sectional survey. *The Lancet*.  
573 2001;358:1129-33.
- 574 3. Ege MJ, Mayer M, Normand A-C, Jon Genuneit WOCMC, Charlotte Braun-Fahrländer, Dick  
575 Heederik, Renaud Piarroux, Erika von Mutius, GABRIELA Transregio 22 Study Group.  
576 Exposure to Environmental Microorganisms and Childhood Asthma. *New England Journal of*  
577 *Medicine*. 2011;364:701-9.
- 578 4. Lehtimäki J, Thorsen J, Rasmussen MA, Hjelmsø M, Shah S, Mortensen MS, et al. Urbanized  
579 microbiota in infants, immune constitution and later risk of atopic diseases. *The Journal of allergy*  
580 *and clinical immunology*. 2020.
- 581 5. Vatanen T, Kostic Aleksandar D, d’Hennezel E, Siljander H, Franzosa Eric A, Yassour M, et al.  
582 Variation in Microbiome LPS Immunogenicity Contributes to Autoimmunity in Humans. *Cell*.  
583 2016;165:842-53.
- 584 6. Honda K, Littman DR. The microbiota in adaptive immune homeostasis and disease. *Nature*.  
585 2016;535:75-84.
- 586 7. Stephen-Victor E, Chatila TA. Regulation of oral immune tolerance by the microbiome in food  
587 allergy. *Current Opinion in Immunology*. 2019;60:141-7.
- 588 8. Schuijs MJ, Willart MA, Vergote K, Gras D, Deswarte K, Ege MJ, et al. Farm dust and endotoxin  
589 protect against allergy through A20 induction in lung epithelial cells. *Science*. 2015;349:1106-  
590 10.



- 591 9. Gilbert JA, Blaser MJ. Current understanding of the human microbiome. 2018;24:392-400.
- 592 10. Zhou D, Zhang H, Bai Z, Zhang A, Bai F, Luo X, et al. Exposure to soil, house dust and  
593 decaying plants increases gut microbial diversity and decreases serum immunoglobulin E  
594 levels in BALB/c mice. *Environmental microbiology*. 2015.
- 595 11. Noora O, Lasse R, Alina S, Hanna S, Piia K, Jenni LK, et al. Soil exposure modifies the gut  
596 microbiota and supports immune tolerance in a mouse model. *Journal of Allergy & Clinical  
597 Immunology*. 2018:S0091674918309345-.
- 598 12. Adlerberth I, Wold A. Establishment of the gut microbiota in Western infants. *Acta Paediatrica*.  
599 2009;98:229-38.
- 600 13. Wopereis H, Oozeer R, Knipping K, Belzer C, Knol J. The first thousand days - intestinal  
601 microbiology of early life: establishing a symbiosis. *Pediatric allergy and immunology* :  
602 official publication of the European Society of Pediatric Allergy and Immunology.  
603 2014;25:428-38.
- 604 14. Rook GA. Regulation of the immune system by biodiversity from the natural environment: an  
605 ecosystem service essential to health. *Proceedings of the National Academy of Sciences of the  
606 United States of America*. 2013;110:18360-7.
- 607 15. Mhuireach G, Johnson BR, Altrichter AE, Ladau J, Meadow JF, Pollard KS, et al. Urban  
608 greenness influences airborne bacterial community composition. *Science of The Total  
609 Environment*. 2016;571:680-7.
- 610 16. Flandroy L, Poutahidis T, Berg G, Clarke G, Dao M-C, Decaestecker E, et al. The impact of  
611 human activities and lifestyles on the interlinked microbiota and health of humans and of  
612 ecosystems. *Science of The Total Environment*. 2018;627:1018-38.
- 613 17. Debarry J, Garn H, Hanuszkiewicz A, Dickgreber N, Blümer N, von Mutius E, et al.  
614 *Acinetobacter lwoffii* and *Lactococcus lactis* strains isolated from farm cowsheds possess  
615 strong allergy-protective properties. *The Journal of allergy and clinical immunology*.  
616 2007;119:1514-21.
- 617 18. Vogel K, Blümer N, Korthals M, Mittelstädt J, Garn H, Ege M, et al. Animal shed *Bacillus*  
618 *licheniformis* spores possess allergy-protective as well as inflammatory properties. *The Journal  
619 of allergy and clinical immunology*. 2008;122:307-12, 12.e1-8.

- 620 19. Fujimura KE, Johnson CC, Ownby DR, Cox MJ, Brodie EL, Havstad SL, et al. Man's best  
621 friend? The effect of pet ownership on house dust microbial communities. *The Journal of*  
622 *allergy and clinical immunology*. 2010;126:410-2, 2.e1-3.
- 623 20. Song SJ, Lauber C, Costello EK, Lozupone CA, Humphrey G, Berg-Lyons D, et al. Cohabiting  
624 family members share microbiota with one another and with their dogs. *eLife*. 2013;2:e00458.
- 625 21. Kembel SW, Jones E, Kline J, Northcutt D, Stenson J, Womack AM, et al. Architectural design  
626 influences the diversity and structure of the built environment microbiome. *Isme j*.  
627 2012;6:1469-79.
- 628 22. von Hertzen L, Hanski I, Haahtela T. Natural immunity. Biodiversity loss and inflammatory  
629 diseases are two global megatrends that might be related. *EMBO reports*. 2011;12:1089-93.
- 630 23. Berendsen RL, Pieterse CM, Bakker PA. The rhizosphere microbiome and plant health. *Trends*  
631 *in plant science*. 2012;17:478-86.
- 632 24. Blum WEH, Zechmeister-Boltenstern S, Keiblinger KM. Does Soil Contribute to the Human  
633 Gut Microbiome? *Microorganisms*. 2019;7:1-16.
- 634 25. Lennon JT, Jones SE. Microbial seed banks: the ecological and evolutionary implications of  
635 dormancy. *Nature reviews Microbiology*. 2011;9:119-30.
- 636 26. Zhou D, Bai Z, Zhang H, Li N, Lu Z. Soil is a key factor influencing gut microbiota and its  
637 effect is comparable to that exerted by diet for mice. *F1000 Research*. 2018;7:1588.
- 638 27. A P. Human geophagy: A review of its distribution, causes and implications. In: Skinner HCW,  
639 Berger AR, editors. *Geology and Health: Closing the Gap*. Oxford, UK: Oxford University  
640 Press; 2003.
- 641 28. Sing D, Sing CF. Impact of direct soil exposures from airborne dust and geophagy on human  
642 health. *Int J Environ Res Public Health*. 2010;7:1205-23.
- 643 29. Grieneisen LE, Charpentier MJE, Alberts SC, Blekhman R, Bradburd G, Tung J, et al. Genes,  
644 geology and germs: Gut microbiota across a primate hybrid zone are explained by site soil  
645 properties, not host species. *Proceedings of the Royal Society B: Biological sciences*. 2019;286.
- 646 30. Azad MB, Konya T, Guttman DS, Field CJ, Sears MR, HayGlass KT, et al. Infant gut  
647 microbiota and food sensitization: associations in the first year of life. *Clinical and*

- 648 experimental allergy : journal of the British Society for Allergy and Clinical Immunology.  
649 2015;45:632-43.
- 650 31. Furusawa Y, Obata Y, Fukuda S, Endo TA, Nakato G, Takahashi D, et al. Commensal  
651 microbe-derived butyrate induces the differentiation of colonic regulatory T cells. *Nature*.  
652 2013;504:446-50.
- 653 32. Wong AR, Raymond B, Collins JW, Crepin VF, Frankel G. The enteropathogenic *E. coli*  
654 effector EspH promotes actin pedestal formation and elongation via WASP-interacting protein  
655 (WIP). *Cellular microbiology*. 2012;14:1051-70.
- 656 33. Royan SV, Jones RM, Koutsouris A, Roxas JL, Falzari K, Weflen AW, et al. Enteropathogenic  
657 *E. coli* non-LEE encoded effectors NleH1 and NleH2 attenuate NF- $\kappa$ B activation. *Mol*  
658 *Microbiol*. 2010;78:1232-45.
- 659 34. Kim M, Ogawa M, Fujita Y, Yoshikawa Y, Nagai T, Koyama T, et al. Bacteria hijack integrin-  
660 linked kinase to stabilize focal adhesions and block cell detachment. *Nature*. 2009;459:578-82.
- 661 35. Büttner D. Protein export according to schedule: architecture, assembly, and regulation of type  
662 III secretion systems from plant- and animal-pathogenic bacteria. *Microbiology and molecular*  
663 *biology reviews* : MMBR. 2012;76:262-310.
- 664 36. Yatsunenko T, Rey FE, Manary MJ, Trehan I, Dominguez-Bello MG, Contreras M, et al.  
665 Human gut microbiome viewed across age and geography. *Nature*. 2012;486:222-7.

666
